# Supplementary material for: Diverse Effects on Mitochondrial and Nuclear Functions Elicited by Drugs and Genetic Knockdowns in Bloodstream Stage Trypanosoma brucei
Source: PubMed Central journal article supplement (PMC2864271; doi:10.1371/journal.pntd.0000678), 2010-05-04
Supplement: pntd.0000678.s001.pdf [file pntd.0000678.s001.pdf]

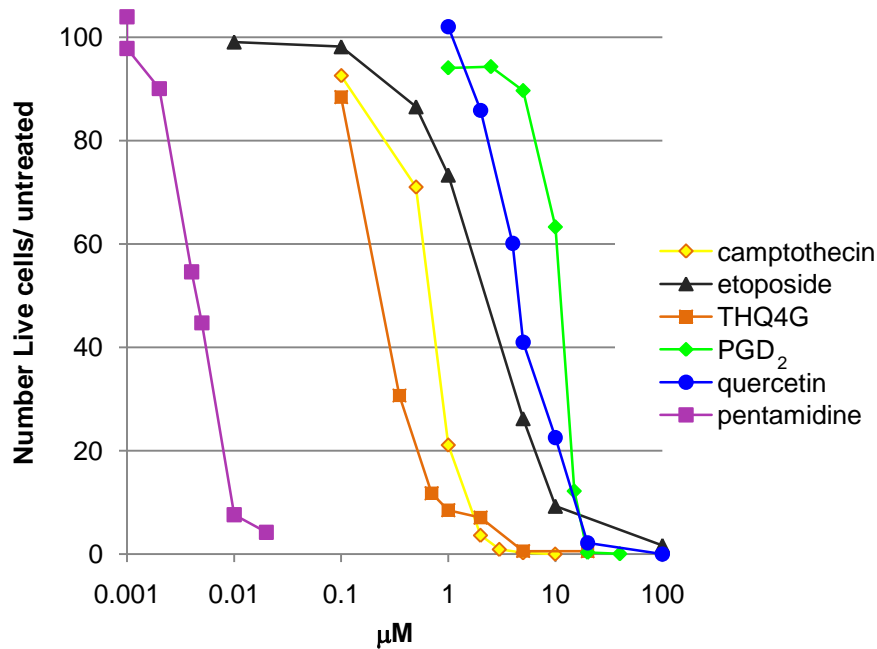

**Fig. S1. Titration curves for drugs.** Triplicate cultures of BF were analyzed following 24 hour treatments with the indicated concentrations of drugs. The Y axis represents the number of live cells compared to the untreated control. The number of live cells was determined by a combination of Coulter counting and the percent live cells as determined by calcein/ ethidium homodimer staining as revealed by flow cytometry as described in Methods.
